# Supplementary material
Source: Springer Nature journal article supplement (https://www.springermedizin.de/resource/supplementary/13075_2011_3648_MOESM5_ESM.pdf/9694954)

**A**

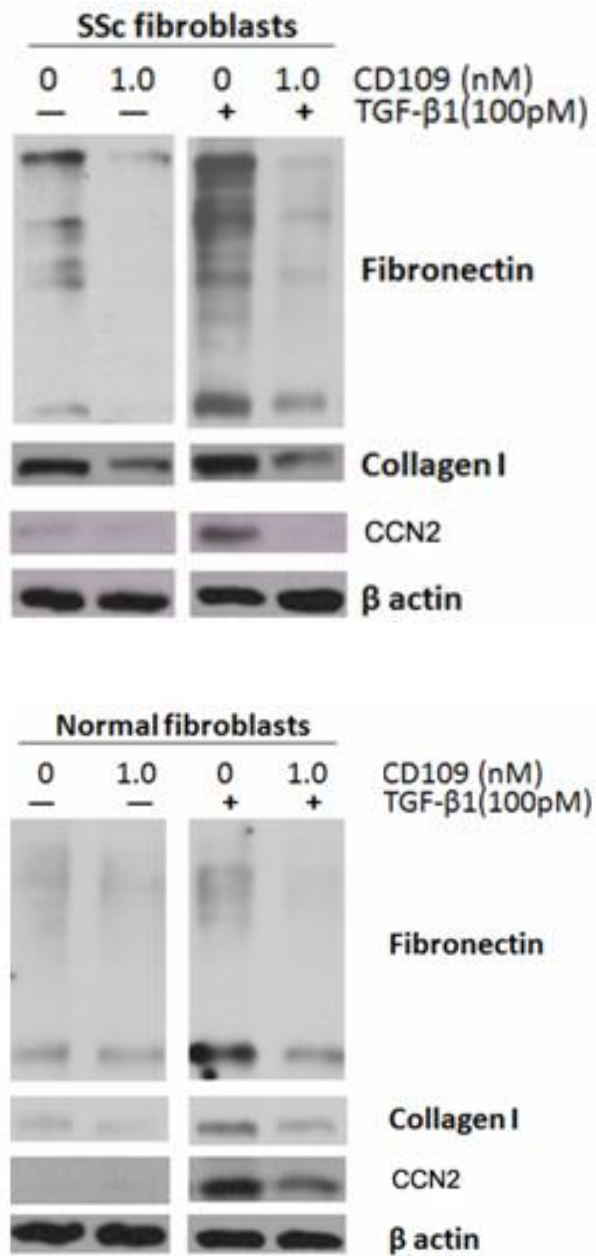

**B**

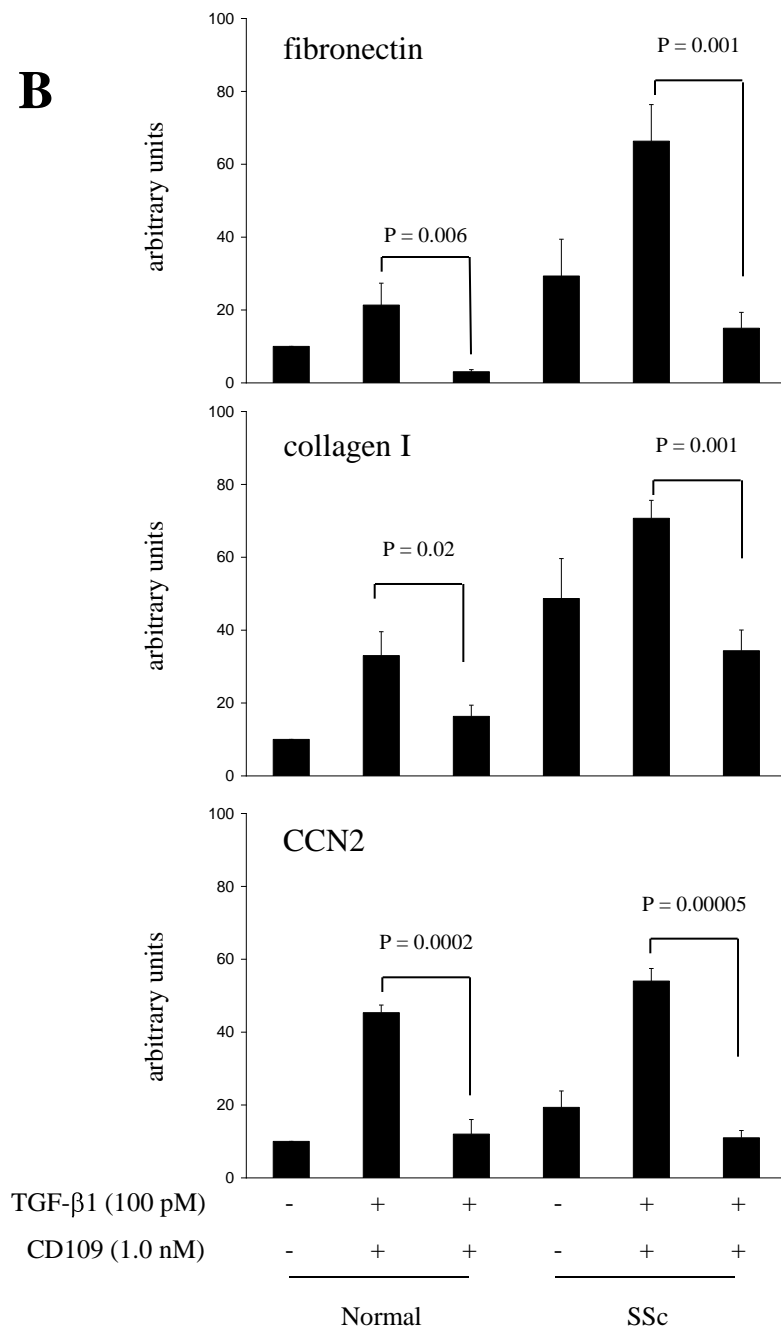

Supplement: MOESM5 [file 9694954]
